# Supplementary material for: Durable SARS-CoV-2 B cell immunity after mild or severe disease
Source: PubMed Central journal article supplement (PMC7605583; doi:10.1101/2020.10.28.20220996), 2020-10-30
Supplement: media-1.pdf [file media-1.pdf]

## **Supplemental Data**

### **Durable SARS-CoV-2 B cell immunity after mild or severe disease**

Clinton O. Ogega<sup>1</sup>, Nicole E. Skinner<sup>1</sup>, Paul W. Blair<sup>1</sup>, Han-Sol Park<sup>2</sup>, Kirsten Littlefield<sup>2</sup>, Abhinaya Ganesan<sup>2</sup>, Pranay Ladiwala<sup>3</sup>, Annukka AR Antar<sup>1</sup>, Stuart C. Ray<sup>1</sup>, Michael J. Betenbaugh<sup>3</sup>, Andrew Pekosz<sup>2</sup>, Sabra L. Klein<sup>2</sup>, Yukari C. Manabe<sup>1</sup>, Andrea L. Cox<sup>1,2</sup>, and Justin R. Bailey<sup>1\*</sup>

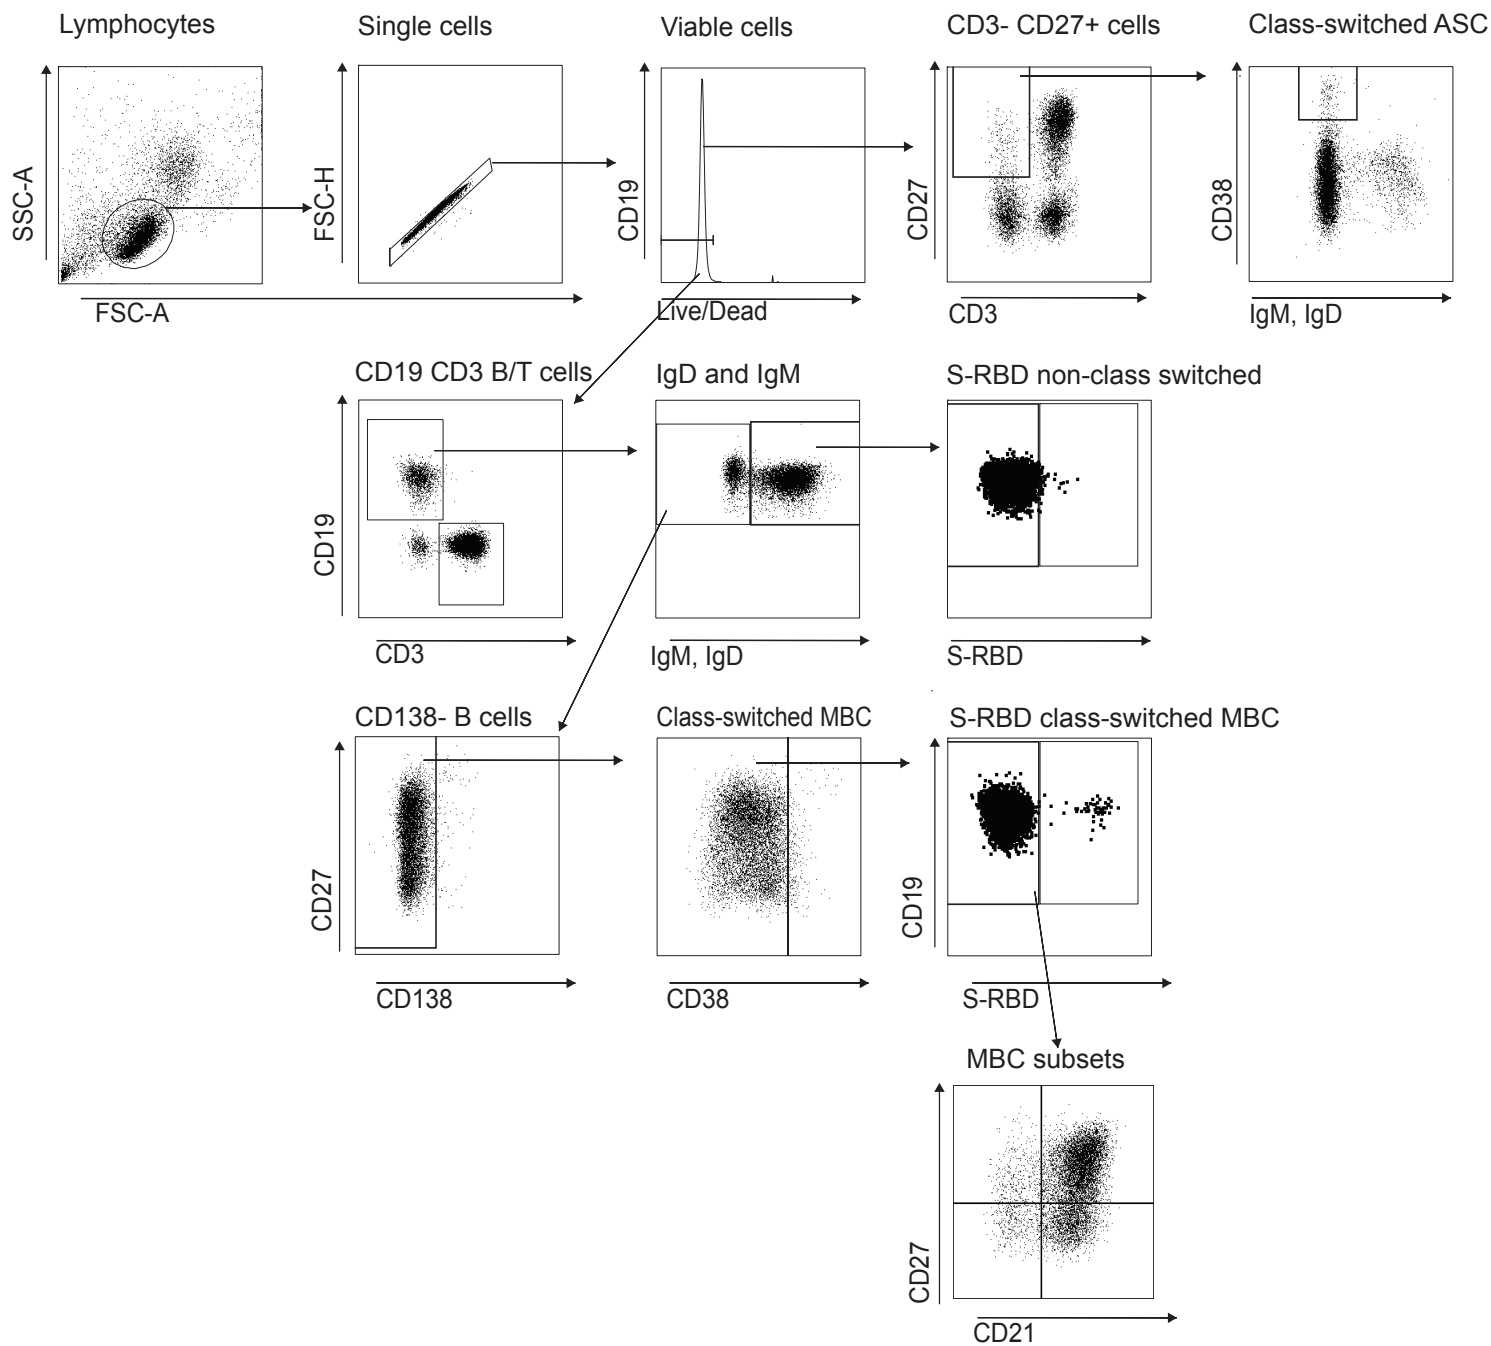

**Supplemental Figure 1: Gating schematic.** All antibodies used are listed in supplemental table 1. Fluorescence minus one (FMO) and isotype controls were used as guide to differentiate positive and negative populations. For S-RBD specific B cells, healthy participants were used as controls to set the gate for positive cells. All cells were run on an LSRII flow cytometer and analyzed using FlowJo.

**Supplemental Table 1. Antibodies used**

| <b>Marker</b>                | <b>Fluorophore</b> | <b>Clone</b>  | <b>Cat #</b>   | <b>Vendor</b>  |
|------------------------------|--------------------|---------------|----------------|----------------|
| IgM                          | BB515              | G20-127       | 564622         | BD Biosciences |
| IgD                          | BB515              | IA6-2         | 565243         | BD Biosciences |
| CD19                         | APC-R700           | HIB19         | 564977         | BD Biosciences |
| CD3                          | APC-H7             | SK7           | 560176         | BD Biosciences |
| CD138                        | BV711              | MI15          | 563184         | BD Biosciences |
| CD21                         | PE-CF594           | B-LY4         | 563474         | BD Biosciences |
| CD27                         | BV786              | L128          | 563327         | BD Biosciences |
| CD38                         | BB700              | HIT2          | 566445         | BD Biosciences |
| BTLA (CD272)                 | BV421              | J168-540      | 564802         | BD Biosciences |
| CD22                         | PE-Cy7             | HIB22         | 563941         | BD Biosciences |
| FCRL5 (CD307e)               | PE                 | 509F6         | 566734         | BD Biosciences |
| CXCR5 (CD185)                | BV480              | RF8B2         | 566142         | BD Biosciences |
| 6x-His Tag mAb               | Alexa Fluor 647    | HIS.H8        | MA1-21315-A647 | ThermoFisher   |
| Fixable Yellow Dead          | BV480              | Viability Dye | L34968         | ThermoFisher   |
| IgG1 Kpa ItCl                | BB700              | X40           | 566404         | BD Biosciences |
| IgG1 Kpa ItCl                | BV711              | X40           | 563044         | BD Biosciences |
| IgG1 Kpa ItCl                | BV421              | X40           | 562438         | BD Biosciences |
| IgG1 Kpa ItCl                | PE-Cy7             | MOPC-21       | 557872         | BD Biosciences |
| IgG2a Kpa ItCl               | PE                 | G155-178      | 554648         | BD Biosciences |
| Rat/Ham Ig Kpa<br>Comp Bead  |                    |               | 552845         | BD Biosciences |
| Ms Ig Kpa Comp<br>Bead Set   |                    |               | 552843         | BD Biosciences |
| Hu Fc Block Pure<br>Fc1.3216 |                    |               | 564220         | BD Biosciences |
| ArC Amine Comp               |                    |               | A10346         | ThermoFisher   |
